# Supplementary material for: Validation of claims-based algorithms for pulmonary arterial hypertension
Source: PubMed Central journal article supplement — Pulm Circ. 2018 Feb 26;8(2):2045894018759246. doi: 10.1177/2045894018759246 (PMC5833187; doi:10.1177/2045894018759246), 2018-02-26
Supplement: Supplemental_Material.pdf [file Supplemental_Material.pdf]

**SUPPLEMENTARY MATERIAL**

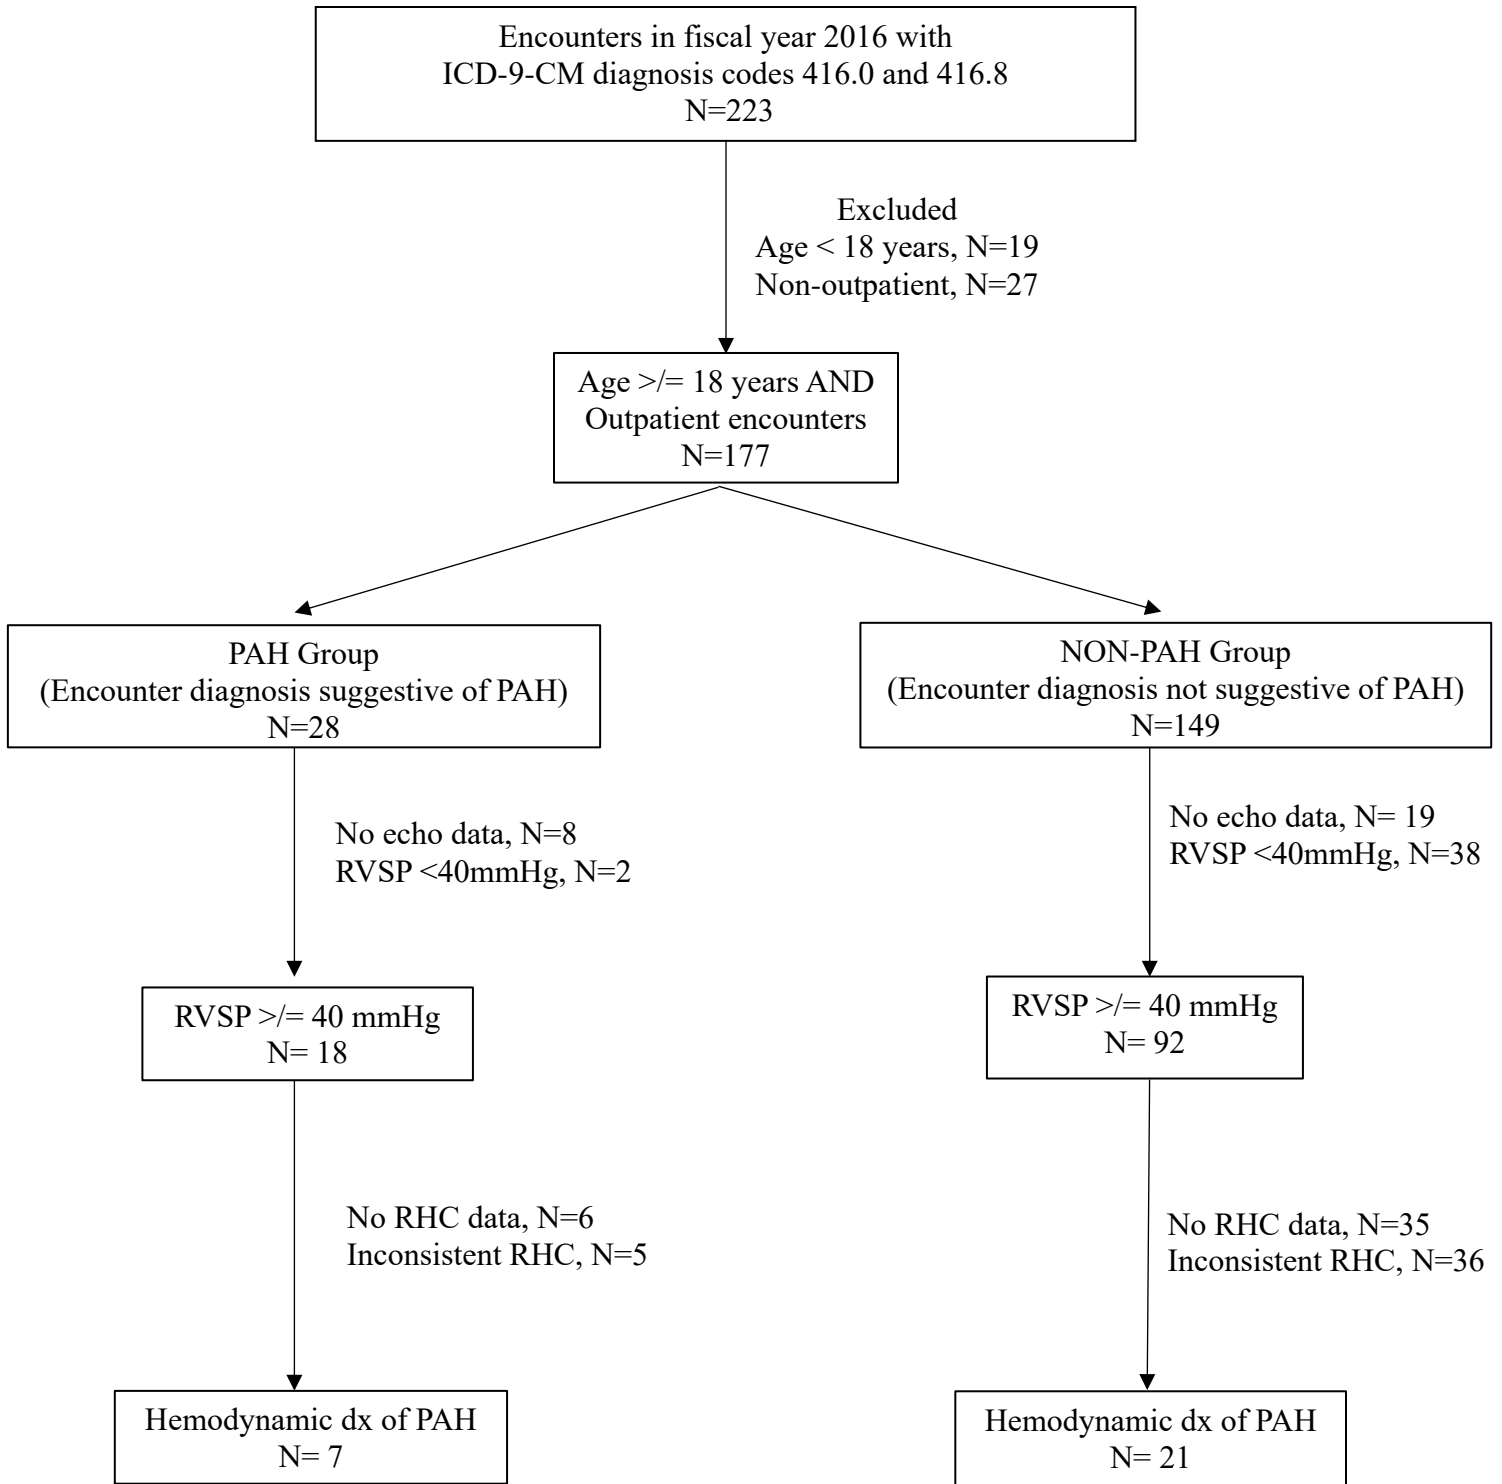

**FIGURE 1e** Validation Cohort selection and dichotomization based on EMR encounter diagnosis. (ICD-9-CM- International classification of diseases-9-clinical modification, PAH- Pulmonary arterial hypertension, RHC- Right heart catheterization, RVSP- Right ventricular systolic pressure)

**TABLE 1e** Baseline Characteristics of the validation cohort: patients in pulmonary arterial hypertension (PAH) and non-PAH groups.

|                            | PAH (n=28)    | Non-PAH (n=149) | P-value |
|----------------------------|---------------|-----------------|---------|
| Age: Mean (SD)             | 66.39 (24.87) | 67.28 (15.14)   | 0.8561  |
| <30 years                  | 5 (17.86%)    | 3 (2.01%)       |         |
| 31-40 years                | 0 (0.00%)     | 8 (5.37%)       |         |
| 41-50 years                | 3 (10.71%)    | 6 (4.03%)       |         |
| 51-60 years                | 1 (3.57%)     | 23 (15.44%)     |         |
| 61-70 years                | 3 (10.71%)    | 41 (27.52%)     |         |
| 71-80 years                | 7 (25.00%)    | 36 (24.16%)     |         |
| 81-90 years                | 5 (17.86%)    | 29 (19.46%)     |         |
| 90+ years                  | 4 (14.29%)    | 3 (2.01%)       |         |
| Sex                        |               |                 | 0.2154  |
| Female                     | 15 (48.39%)   | 93 (60.00%)     |         |
| Male                       | 16 (51.61%)   | 62 (40.00%)     |         |
| Race                       |               |                 | 1.000   |
| Not Hispanic or Latino     | 28 (100%)     | 147 (98.66%)    |         |
| Unknown                    | 0 (0.00%)     | 0 (0.00%)       |         |
| Hispanic or Latino         | 0 (0.00%)     | 2 (1.34%)       |         |
| Comorbidities              |               |                 |         |
| Hypertension               | 19 (67.86%)   | 111 (74.50%)    | 0.4654  |
| Congestive Heart Failure   | 7 (25.00%)    | 64 (42.95%)     | 0.0210  |
| Sleep Disordered Breathing | 6 (21.43%)    | 46 (30.87%)     | 0.3141  |
| Diabetes Mellitus          | 8 (28.57%)    | 55 (36.91%)     | 0.3977  |
| Chronic Pulmonary Disease  | 5 (17.86%)    | 31 (20.81%)     | 0.7221  |
| Atrial Fibrillation        | 5 (17.86%)    | 34 (22.82%)     | 0.5611  |
| Obesity                    | 10 (35.71%)   | 69 (46.31%)     | 0.3008  |
| Coronary Artery Disease    | 11 (39.29%)   | 40 (26.85%)     | 0.1823  |
| Valvular Heart Disease     | 6 (21.43%)    | 21 (14.09%)     | 0.3881  |
| Connective Tissue Disorder | 2 (7.14%)     | 19 (12.75%)     | 0.5356  |
| Liver Disease              | 4 (14.29%)    | 9 (6.04%)       | 0.1291  |
| Atrial Flutter             | 0 (0.00%)     | 4 (2.68%)       | 1.0000  |
| Congenital Heart Disease   | 7 (25.00%)    | 13 (8.72%)      | 0.0210  |
| HIV                        | 0 (0.00%)     | 1 (0.67%)       | 1.0000  |
| Interstitial Lung Disease  | 2 (7.14%)     | 19 (12.75%)     | 0.5356  |

## **2x2 ANALYSIS FOR CLAIMS ALGORITHMS**

(Dx- diagnosis; EMR- Electronic medical record; RHC- Right heart catheterization; PAHRx- PAH-specific therapies; PPV- positive predictive value; NPV- negative predictive value).

### *DEVELOPMENT ALGORITHMS*

| ICD-9-CM codes 416.0 and 416.8 | Gold Standard +  | Gold Standard - | Total |
|--------------------------------|------------------|-----------------|-------|
| Test +                         | 49+3(4.92)=63.76 | 619.24          | 683   |
| Test -                         | --               | --              | --    |
| Total                          | --               | --              | --    |

#### **A) Claims-based algorithms**

PPV =  $63.76/683 = 9.33\%$

| ICD codes + At least one PAHRx | Gold Standard + | Gold Standard -    | Total  |
|--------------------------------|-----------------|--------------------|--------|
| Test +                         | 43              | 22+12(4.92)=81.04  | 124.04 |
| Test -                         | 6+3(4.92)=20.76 | 120+85(4.92)=538.2 | 558.96 |
| Total                          | 63.76           | 619.24             | 683    |

Sensitivity =  $43/63.46 = 67.44\%$

Specificity =  $538.2/619.24 = 86.91\%$

PPV =  $43/124.04 = 34.67\%$

NPV =  $538.2/558.96 = 96.29\%$

| ICD codes + Two or more classes PAHRx | Gold Standard +  | Gold Standard -     | Total               |
|---------------------------------------|------------------|---------------------|---------------------|
| Test +                                | 18               | 4+1(4.92)=8.92      | 22+1(4.92)=26.92    |
| Test -                                | 31+3(4.92)=45.76 | 138+96(4.92)=610.32 | 169+99(4.92)=656.08 |
| Total                                 | 63.76            | 619.24              | 683                 |

Sensitivity =  $18/63.76 = 28.23\%$

Specificity =  $610.32/619.24 = 98.56\%$

PPV =  $18/26.92 = 66.86\%$

NPV =  $610.32/656.08 = 93.03\%$

#### **B) EMR Based algorithms**

| ICD9 + EMR encounter dx | Gold Standard + | Gold Standard - | Total |
|-------------------------|-----------------|-----------------|-------|
| Test +                  | 49              | 142             | 191   |
| Test -                  | 3(4.92)=14.76   | 97(4.92)=477.24 | 492   |
| Total                   | 63.76           | 619.24          | 683   |

Sensitivity =  $49/63.76 = 76.85\%$

Specificity =  $477.24/619.24 = 77.07\%$

PPV =  $49/191 = 25.65\%$

NPV =  $477.24/492 = 97.00\%$

| ICD codes + EMR encounter dx + echo | Gold Standard + | Gold Standard - | Total |
|-------------------------------------|-----------------|-----------------|-------|
|-------------------------------------|-----------------|-----------------|-------|

|        |               |                      |     |
|--------|---------------|----------------------|-----|
| Test + | 49            | 135                  | 184 |
| Test - | 3(4.92)=14.76 | 97(4.92) + 7= 484.24 | 499 |
| Total  | 63.76         | 619.24               | 683 |

Sensitivity =  $49/63.76=76.85\%$

Specificity =  $484.24/619.24=78.20\%$

PPV =  $49/184=26.63\%$

NPV =  $484.24/499=97.04\%$

| ICD codes + EMR<br>encounter dx + echo<br>+ RHC | Gold Standard + | Gold Standard -           | Total |
|-------------------------------------------------|-----------------|---------------------------|-------|
| Test +                                          | 49              | 53                        | 102   |
| Test -                                          | 3(4.92)=14.76   | 97(4.92) + 89 =<br>566.24 | 581   |
| Total                                           | 63.76           | 619.24                    | 683   |

Sensitivity =  $49/63.76=76.85\%$

Specificity =  $566.24/619.24=91.44\%$

PPV =  $49/102=48.04\%$

NPV =  $566.24/581=97.46\%$

| ICD codes + EMR<br>encounter dx + echo<br>+ RHC + at least one<br>PAHRx | Gold Standard + | Gold Standard -     | Total |
|-------------------------------------------------------------------------|-----------------|---------------------|-------|
| Test +                                                                  | 43              | 19                  | 62    |
| Test -                                                                  | 6+3(4.92)=20.76 | 123+97(4.92)=600.24 | 621   |
| Total                                                                   | 63.76           | 619.24              | 683   |

Sensitivity =  $43/63.76 = 67.44\%$

Specificity =  $600.24/619.24 = 96.93\%$

PPV =  $43/62 = 69.35\%$

NPV =  $600.24/621 = 96.66\%$

| ICD codes + EMR<br>encounter dx + at<br>least one PAHRx | Gold Standard +  | Gold Standard -          | Total |
|---------------------------------------------------------|------------------|--------------------------|-------|
| Test +                                                  | 43               | 22                       | 65    |
| Test -                                                  | 6+ 3*4.92 =20.76 | 120 + 97*4.92<br>=597.24 | 618   |
| Total                                                   | 63.76            | 619.24                   | 683   |

PPV =  $43/65 = 66.15\%$

NPV =  $597.24/618 = 96.64\%$

Sensitivity =  $43/63.76 = 67.44\%$

Specificity =  $597.24/619.24 = 96.45\%$

VALIDATION ALGORITHMS

**A) Claims-based algorithms**

| ICD-9-CM codes<br>416.0 and 416.8 | Gold Standard + | Gold Standard - | Total |
|-----------------------------------|-----------------|-----------------|-------|
| Test +                            | 28              | 149             | 177   |
| Test -                            | --              | --              | --    |
| Total                             | --              | --              | --    |

PPV =  $28/177 = 15.82\%$

| ICD codes + At least<br>one PAHRx | Gold Standard + | Gold Standard - | Total |
|-----------------------------------|-----------------|-----------------|-------|
| Test +                            | 18              | 27              | 45    |
| Test -                            | 10              | 122             | 132   |
| Total                             | 28              | 149             | 177   |

PPV =  $18/45 = 40.00\%$

NPV =  $122/132 = 92.42\%$

Sensitivity =  $18/28 = 64.29\%$

Specificity =  $122/149 = 81.88\%$

| ICD codes + More<br>than one PAHRx | Gold Standard + | Gold Standard - | Total |
|------------------------------------|-----------------|-----------------|-------|
| Test +                             | 12              | 9               | 21    |
| Test -                             | 16              | 140             | 156   |
| Total                              | 28              | 149             | 177   |

PPV =  $12/21 = 57.14\%$

NPV =  $139/156 = 89.74\%$

Sensitivity =  $12/28 = 42.86\%$

Specificity =  $140/149 = 93.96\%$

**B) EMR Based algorithms**

| ICD codes +<br>Encounter dx | Gold Standard + | Gold Standard - | Total |
|-----------------------------|-----------------|-----------------|-------|
| Test +                      | 7               | 21              | 28    |
| Test -                      | 21              | 128             | 149   |
| Total                       | 28              | 149             | 177   |

PPV =  $7/28 = 25.00\%$

NPV =  $128/149 = 85.91\%$

Sensitivity =  $7/28 = 25.00\%$

Specificity =  $128/149 = 85.91\%$

| ICD codes +<br>Encounter dx + echo | Gold Standard + | Gold Standard - | Total |
|------------------------------------|-----------------|-----------------|-------|
| Test +                             | 7               | 13              | 20    |
| Test -                             | 21              | 136             | 157   |

|       |    |     |     |
|-------|----|-----|-----|
| Total | 28 | 149 | 177 |
|-------|----|-----|-----|

PPV =  $7/20=35.00\%$

NPV =  $136/157=86.62\%$

Sensitivity =  $7/28=25.00\%$

Specificity =  $136/149=91.28\%$

| ICD codes +<br>Encounter dx + echo<br>+ RHC | Gold Standard + | Gold Standard - | Total |
|---------------------------------------------|-----------------|-----------------|-------|
| Test +                                      | 7               | 5               | 12    |
| Test -                                      | 21              | 144             | 165   |
| Total                                       | 28              | 149             | 177   |

PPV =  $7/12=58.33\%$

NPV =  $144/165=87.27\%$

Sensitivity =  $7/28=25.00\%$

Specificity =  $144/149=96.64\%$

| ICD codes +<br>Encounter dx + echo<br>+ RHC + at least one<br>PAHRx | Gold Standard + | Gold Standard - | Total |
|---------------------------------------------------------------------|-----------------|-----------------|-------|
| Test +                                                              | 5               | 3               | 8     |
| Test -                                                              | 23              | 146             | 169   |
| Total                                                               | 28              | 149             | 177   |

PPV =  $5/8= 62.50\%$

NPV =  $146/169= 86.39\%$

Sensitivity =  $5/28= 17.86\%$

Specificity =  $146/149= 97.99\%$

| ICD9 + ENC DX + at<br>least one PAHRx | Gold Standard + | Gold Standard - | Total |
|---------------------------------------|-----------------|-----------------|-------|
| Test +                                | 5               | 6               | 11    |
| Test -                                | 23              | 143             | 166   |
| Total                                 | 28              | 149             | 177   |

PPV =  $5/11= 45.45\%$

NPV =  $143/166= 86.14\%$

Sensitivity =  $5/28= 17.86\%$

Specificity =  $143/149= 95.97\%$
